# Supplementary material for: Single-Shot On-Axis Fizeau Polarization Phase-Shifting Digital Holography for Complex-Valued Dynamic Object Imaging
Source: MDPI journal article supplement (doi:10.3390/photonics9030126), 2022-02-23
Supplement: s1 [file s1]

Archive with 2 entries (2 files):
- photonics-1579859-Supplementary.pdf
- Visualization1.mp4
